# Supplementary material
Source: publisher figshare collection journal article supplement (https://acs.figshare.com/ndownloader/files/3625866)
Supplement: Supplementary file 1 [file 3625866]

## Supporting Information

# Design, Synthesis, and Biological Activity of Sulfonamide Analogues of Antofine and Cryptopleurine as Potent and Orally Active Antitumor Agents

Yongseok Kwon,<sup>†,‡</sup> Jayoung Song,<sup>‡,‡</sup> Honggu Lee,<sup>†</sup> Eun-Yeong Kim,<sup>§</sup> Kiho Lee,<sup>§</sup> Sang Kook Lee,<sup>\*,‡</sup> Sanghee Kim<sup>\*,†</sup>

<sup>†</sup>Research Institute of Pharmaceutical Science, College of Pharmacy, Seoul National University, Seoul 151-742, Korea <sup>‡</sup>Natural Products Research Institute, College of Pharmacy, Seoul National University, Seoul 151-742, Korea <sup>§</sup>College of Pharmacy, Korea University, Sejong 339-700, Korea

## Contents

|                                                                               |         |
|-------------------------------------------------------------------------------|---------|
| 1. General methods for chemistry                                              | S1      |
| 2. Synthesis of compounds (±)- <b>5b</b> , (±)- <b>12b</b> , and <b>13–15</b> | S2–S9   |
| 3. HPLC analysis                                                              | S10–S21 |
| 4. Antitumor activity of ( <i>R</i> )-cryptopleurine ( <b>2</b> )             | S22     |

## 1. General Methods for Chemistry

All chemicals were reagent grade and used as purchased. All reactions were performed under an inert atmosphere of dry nitrogen using distilled dry solvents. Reactions were monitored via TLC analysis using silica gel 60 F-254 thin-layer plates. Compounds were visualized on the TLC plates under UV light and by spraying with either  $\text{KMnO}_4$  or anisaldehyde solutions. Flash column chromatography was conducted on silica gel 60 (230–400 mesh). Melting points were measured using a Buchi B-540 melting point apparatus without correction.  $^1\text{H}$  NMR (400, 500, or 600 MHz) and  $^{13}\text{C}$  NMR (75, 100, 125, or 150 MHz) spectra were recorded in  $\delta$  units using residual  $\text{CHCl}_3$  ( $\delta$  7.24 ppm) and  $\text{CDCl}_3$  ( $\delta$  77.0 ppm) as an internal standard. The IR spectra were measured on a Fourier Transform Infrared spectrometer. High-resolution mass spectra (HRMS) were recorded using FAB. All final target compounds were characterized and determined to be least >95% pure by analytical HPLC (Agilent 1200 Series, Agilent Technologies, Palo Alto, CA, USA) using the following method. Mobile phase A consisted of 0.1% formic acid in HPLC-grade water. HPLC analysis was performed using a reverse-phase Agilent Eclipse Plus C18 column ( $4.6 \times 150$  mm,  $3.5 \mu\text{m}$ ) at a flow rate of 0.7 mL/min (30–100% aqueous MeOH with 0.1% formic acid over 20 min and MeOH with 0.1% formic acid from 20 to 25 min).

## 2. Synthesis of compounds (±)-5b, (±)-12b, and 13–15

### 2.1. Synthesis of compounds 13

**Scheme S1.** Synthesis of compounds **13**.<sup>a</sup>

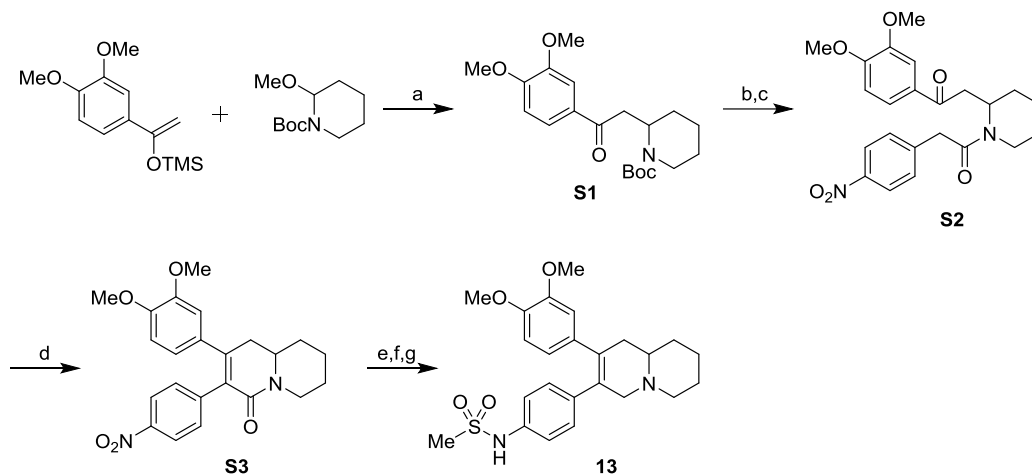

<sup>a</sup>Reaction conditions: (a) InCl<sub>3</sub>, CH<sub>2</sub>Cl<sub>2</sub>, 92%; (b) TFA, CH<sub>2</sub>Cl<sub>2</sub>; (c) 4-nitrophenylacetic acid, EDCI, DMAP, CH<sub>2</sub>Cl<sub>2</sub>, 83% (over two steps); (d) K<sub>2</sub>CO<sub>3</sub>, EtOH, reflux, 76%; (e) SnCl<sub>2</sub>, EtOH, 75 °C; (f) Sodium bis(2-methoxyethoxy)aluminum hydride, 1,4-dioxane; (g) MeSO<sub>2</sub>Cl, pyridine, CH<sub>2</sub>Cl<sub>2</sub>, 51% for **13** (over three steps).

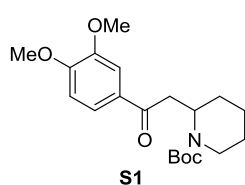

*tert*-Butyl 2-(2-(3,4-dimethoxyphenyl)-2-oxoethyl)piperidine-1-carboxylate (**S1**). To a stirred solution of *tert*-butyl 2-methoxypiperidine-1-carboxylate<sup>1</sup> (8.11 g, 37.7 mmol) in 30 mL of dry CH<sub>2</sub>Cl<sub>2</sub> was added ((1-(3,4-dimethoxyphenyl)vinyl)oxy)trimethylsilane<sup>2</sup> (11.4 g, 45.2 mmol) and InCl<sub>3</sub> (418 mg, 1.89 mmol) and the reaction mixture was stirred

for 1 h. The reaction mixture was filtered over a Celite pad, and the filtrate was concentrated in vacuo. The crude product was separated by silica gel column chromatography (hexane/EtOAc, 2:1) to give the desired ketone **S1** (12.6 g, 92%) as a pale yellow solid. The spectral data of **S1** were identical to those of **7b**.

(1) Su, B.; Chen, F.; Wang, L.; Wang, Q. Design, Synthesis, Antiviral Activity, and Structure–Activity Relationships (SARs) of Two Types of Structurally Novel Phenanthroindo/quinolizidine Analogues. *J. Agric. Food Chem.* **2014**, 62, 1233–1239.

(2) Brown, D. S.; Charreau, P.; Hansson, T.; Ley, S. V. Substitution reactions of 2-phenylsulfonyl-piperidines and -pyrrolidines with carbon nucleophiles: Synthesis of the pyrrolidine alkaloids norruspoline and ruspolinone. *Tetrahedron* **1991**, 47, 1311–1328.

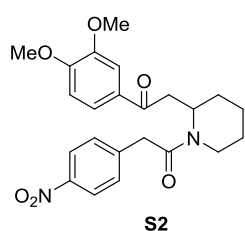

*1-(3,4-Dimethoxyphenyl)-2-(1-(2-(4-nitrophenyl)acetyl)piperidin-2-yl)ethan-1-one (S2).*

To a stirred solution of **S1** (11.3 g, 31.1 mmol) in 100 mL of CH<sub>2</sub>Cl<sub>2</sub> was added TFA (25 mL) at room temperature, and the reaction mixture was stirred for 2 h. The reaction mixture was basified with 1 N NaOH and extracted with EtOAc. The solvent was concentrated in vacuo, and the crude amine was used for the next reaction without further purification. To a stirred solution of 4-nitrophenylacetic acid (6.76 g, 37.3 mmol) in 100 mL of CH<sub>2</sub>Cl<sub>2</sub> was added EDCI (6.56 g, 34.2 mmol), DMAP (4.18 g, 34.2 mmol), and the obtained crude amine at room temperature, and the reaction mixture was stirred for 15 h. The reaction was quenched with 1 N HCl at room temperature, diluted with H<sub>2</sub>O, and extracted with CH<sub>2</sub>Cl<sub>2</sub>. The organic layer was dried over MgSO<sub>4</sub> and concentrated in vacuo. The crude product was separated by silica gel column chromatography (hexane/EtOAc, 1:3) to give an amide **S2** (11.0 g, 83%) as a white waxy solid. The spectral data of **S2** were identical to those of **8b**.

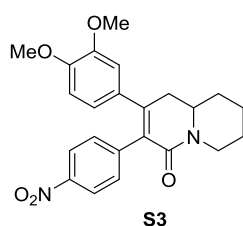

*2-(3,4-Dimethoxyphenyl)-3-(4-nitrophenyl)-1,6,7,8,9a-hexahydro-4H-quinolizin-4-one (S3).*

To a stirred solution of amide **S2** (6.31 g, 14.8 mmol) in 100 mL of EtOH was added K<sub>2</sub>CO<sub>3</sub> (900 mg) at room temperature, and the reaction mixture was refluxed for 1.5 h. The reaction mixture was cooled to room temperature and concentrated in vacuo. The reaction mixture was diluted with H<sub>2</sub>O and extracted with CH<sub>2</sub>Cl<sub>2</sub>. The organic layer was dried over MgSO<sub>4</sub> and concentrated in vacuo. The crude product was separated by silica gel column chromatography (hexane/EtOAc, 1:1) to give an unsaturated amide **S3** (4.59 g, 76%) as a yellow solid. The spectral data of **S3** were identical to those of **9b**.

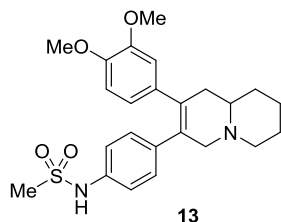

*N-(4-(8-(3,4-Dimethoxyphenyl)-1,3,4,6,9a-hexahydro-2H-quinolizin-7-yl)phenyl)methanesulfonamide (13).*

To a stirred solution of **S3** (75 mg, 0.18 mmol) in 4 mL of EtOH was added SnCl<sub>2</sub> (171 mg, 0.902 mmol) at room temperature, and the reaction mixture was stirred for 3 h at 75 °C. The reaction mixture was quenched with sat. NaHCO<sub>3</sub> solution, diluted with H<sub>2</sub>O, and extracted with EtOAc. The organic layer was dried over MgSO<sub>4</sub> and concentrated in vacuo to afford crude aniline **S4** as a yellow waxy solid. To a stirred solution of crude aniline **S4** in 10 mL of 1,4-dioxane was carefully added Red-Al (170 μL, 0.54 mmol, > 60 wt. % in toluene) at 0 °C, and

the reaction mixture was stirred for 1 h at room temperature. The reaction mixture was quenched by successive addition of H<sub>2</sub>O, a 15% NaOH aq. soln., and H<sub>2</sub>O. The suspension was then filtered over a Celite Pad, and the filtrate was concentrated in vacuo to afford crude quinolizidine **S5** as a brown solid. To a stirred solution of crude quinolizidine **S5** in 3 mL of CH<sub>2</sub>Cl<sub>2</sub> was added pyridine (22  $\mu$ L, 0.27 mmol) and methanesulfonyl chloride (21  $\mu$ L, 0.27 mmol) at 0 °C, and the reaction mixture was stirred for 2 h at room temperature. The reaction mixture was quenched with sat. NaHCO<sub>3</sub> solution, diluted with H<sub>2</sub>O, and extracted with CH<sub>2</sub>Cl<sub>2</sub>. The organic layer was dried over MgSO<sub>4</sub> and concentrated in vacuo. The crude product was separated by silica gel column chromatography (CH<sub>2</sub>Cl<sub>2</sub>/MeOH, 15:1) to give an sulfonamide **13** (41 mg, 51%) as a yellow waxy solid. <sup>1</sup>H NMR (500 MHz, CDCl<sub>3</sub>)  $\delta$  6.99 (dd,  $J$  = 8.8 Hz, 11.7 Hz, 4H), 6.61 (q,  $J$  = 8.4 Hz, 2H), 6.40 (d,  $J$  = 1.2 Hz, 1H), 3.76 (s, 3H), 3.60 (d,  $J$  = 16.6 Hz, 1H), 3.51 (s, 3H), 3.09 (d,  $J$  = 11.2 Hz, 1H), 3.04 (d,  $J$  = 16.6 Hz, 1H), 2.90 (s, 3H), 2.50 (d,  $J$  = 16.8 Hz, 1H), 2.41 (d,  $J$  = 9.4 Hz, 1H), 2.35 (d,  $J$  = 13.2 Hz, 1H), 2.11 (dd,  $J$  = 11.0 Hz, 15.0 Hz, 1H), 1.83 (d,  $J$  = 8.5 Hz, 2H), 1.70 (brs, 2H), 1.38–1.31 (m, 2H); <sup>13</sup>C NMR (125 MHz, CDCl<sub>3</sub>)  $\delta$  147.9, 147.4, 138.0, 134.9, 133.9, 132.5, 130.7, 130.3 (2C), 120.6, 120.4 (2C), 112.8, 110.5, 59.7, 57.8, 55.7, 55.5, 55.4, 39.3, 39.2, 33.0, 25.6, 24.1; IR (CHCl<sub>3</sub>)  $\nu_{\text{max}}$  3256, 2933, 2255, 1510, 1325, 1253, 1151, 1025, 910, 728 (cm<sup>-1</sup>); HRMS (FAB): calcd. for C<sub>24</sub>H<sub>31</sub>N<sub>2</sub>O<sub>4</sub>S [M+H]<sup>+</sup> 443.2005, found 443.2006.

## 2.2. Synthesis of compounds (±)-**5b**, (±)-**12b**, **14**, and **15**

**Scheme S2.** Synthesis of compounds (±)-**5b**, (±)-**12b**, **14**, and **15**.<sup>a</sup>

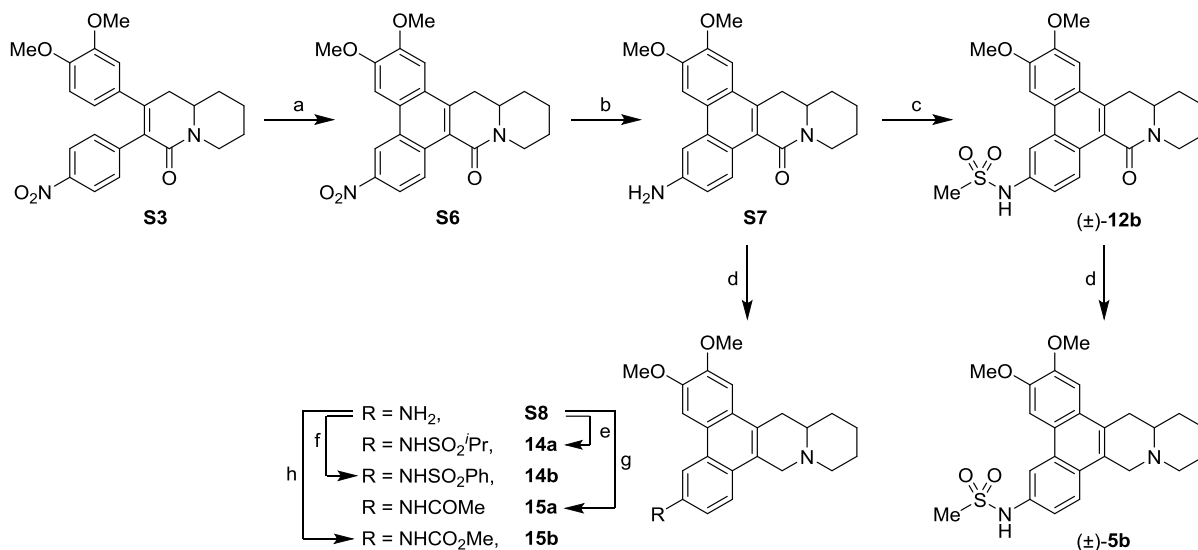

**S6** 2,3-Dimethoxy-6-nitro-11,12,13,14,15-hexahydro-9H-dibenzo[f,h]pyrido[1,2-b]isoquinolin-9-one (**S6**). To a stirred solution of **S3** (2.10 g, 5.14 mmol) in 40 mL of  $\text{CH}_2\text{Cl}_2$  was added phenyliodine(III) bis(trifluoroacetate) (PIFA) (2.66 g, 6.17 mmol) and  $\text{BF}_3 \cdot \text{OEt}_2$  (950  $\mu\text{L}$ , 7.70 mmol) at  $-10^\circ\text{C}$ , and the reaction mixture was stirred for 30 min at  $-10^\circ\text{C}$ . The reaction mixture was quenched with sat.  $\text{NaHCO}_3$  solution, diluted with  $\text{H}_2\text{O}$ , and extracted with  $\text{CH}_2\text{Cl}_2$ . The organic layer was dried over  $\text{MgSO}_4$  and concentrated in vacuo. The crude product was separated by silica gel column chromatography ( $\text{CH}_2\text{Cl}_2/\text{EtOAc}$ , 10:1) to give an amide **S6** (1.98 g, 95%) as a yellow solid. The spectral data of **S6** were identical to those of **10b**.

**(±)-12b** N-(2,3-Dimethoxy-9-oxo-11,12,13,14,15-hexahydro-9H-dibenzo[f,h]pyrido[1,2-b]isoquinolin-6-yl)methanesulfonamide ((±)-**12b**). To a stirred solution of **S6** (95 mg, 0.23 mmol) in 8 mL of EtOH was added  $\text{SnCl}_2$  (218 mg, 1.15 mmol) at room temperature, and the reaction mixture was stirred for 6 h at

75 °C. The reaction mixture was quenched with sat. NaHCO<sub>3</sub> solution, diluted with H<sub>2</sub>O, and extracted with CH<sub>2</sub>Cl<sub>2</sub>. The organic layer was dried over MgSO<sub>4</sub> and concentrated in vacuo to afford crude aniline **S7** as a yellow solid. To a stirred solution of crude aniline **S7** in 3 mL of CH<sub>2</sub>Cl<sub>2</sub> was added pyridine (28 µL, 0.35 mmol) and methanesulfonyl chloride (27 µL, 0.35 mmol) at 0 °C, and the reaction mixture was stirred for 1 h at room temperature. The reaction mixture was quenched with sat. NaHCO<sub>3</sub> solution, diluted with H<sub>2</sub>O, and extracted with CH<sub>2</sub>Cl<sub>2</sub>. The organic layer was dried over MgSO<sub>4</sub> and concentrated in vacuo. The crude product was separated by silica gel column chromatography (CH<sub>2</sub>Cl<sub>2</sub>/MeOH, 40:1) to give **14** (65 mg, 62%) as a pale yellow solid. The spectral data of (±)-**12b** were identical to those of **12b**.

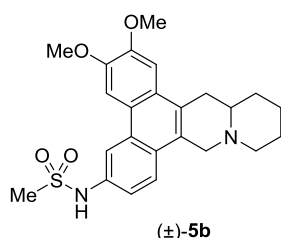

*N*-(2,3-Dimethoxy-11,12,13,14,14a,15-hexahydro-9H-dibenzo[*f,h*]pyrido[1,2-*b*]isoquinolin-6-yl)methanesulfonamide ((±)-**5b**). To a stirred solution of (±)-**12b** (60 mg, 0.13 mmol) in 6 mL of THF was added LiAlH<sub>4</sub> (200 µL, 0.20 mmol, 1 M solution in THF) at 0 °C, and the reaction mixture was refluxed for 2 h. The reaction mixture

was quenched by successive addition of H<sub>2</sub>O, a 15% NaOH aq. soln., and H<sub>2</sub>O. The suspension was then filtered over a Celite Pad, and the filtrate was concentrated in vacuo. The crude product was separated by silica gel column chromatography (CH<sub>2</sub>Cl<sub>2</sub>/MeOH, 15:1) to give the desired product **5b** (44 mg, 77%) as a pale yellow solid. The spectral data of (±)-**5b** were identical to those of **5b**.

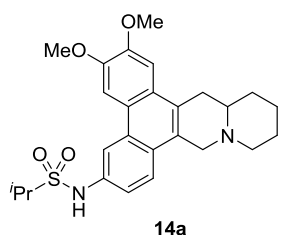

*N*-(2,3-Dimethoxy-11,12,13,14,14a,15-hexahydro-9H-dibenzo[*f,h*]pyrido[1,2-*b*]isoquinolin-6-yl)propane-2-sulfonamide (**14a**). To a stirred solution of **S6** (81 mg, 0.20 mmol) in 4 mL of EtOH was added SnCl<sub>2</sub> (190 mg, 1.00 mmol) at room temperature, and the reaction mixture was stirred for 6 h at 75 °C. The reaction

mixture was quenched with sat. NaHCO<sub>3</sub> solution, diluted with H<sub>2</sub>O, and extracted with EtOAc. The organic layer was dried over MgSO<sub>4</sub> and concentrated in vacuo to afford crude aniline **S7** as a yellow waxy solid. To a stirred solution of crude aniline **S7** in 10 mL of THF was carefully added LiAlH<sub>4</sub> (400 µL, 0.40 mmol, 1 M solution in THF) at 0 °C, and the reaction mixture was refluxed for 1 h. The reaction mixture was quenched by successive addition of H<sub>2</sub>O, a 15% NaOH aq. soln., and H<sub>2</sub>O. The suspension was then filtered over a Celite Pad, and the filtrate was concentrated in vacuo to afford crude quinolizidine **S8** as a brown solid. To a stirred solution of crude

quinolizidine **S8** in 3 mL of CH<sub>2</sub>Cl<sub>2</sub> was added pyridine (32  $\mu$ L, 0.40 mmol) and 2-propanesulfonyl chloride (45  $\mu$ L, 0.40 mmol) at 0 °C, and the reaction mixture was stirred for 8 h at room temperature. The reaction mixture was quenched with sat. NaHCO<sub>3</sub> solution, diluted with H<sub>2</sub>O, and extracted with CH<sub>2</sub>Cl<sub>2</sub>. The organic layer was dried over MgSO<sub>4</sub> and concentrated in vacuo. The crude product was separated by silica gel column chromatography (CH<sub>2</sub>Cl<sub>2</sub>/MeOH, 15:1) to give a sulfonamide **14a** (53 mg, 57%) as a pale yellow solid. mp 255.1–257.3 °C; <sup>1</sup>H NMR (500 MHz, CDCl<sub>3</sub>)  $\delta$  8.12 (s, 1H), 7.67 (s, 1H), 7.63 (d, *J* = 8.7 Hz, 1H), 7.27–7.22 (m, 2H), 4.32 (d, *J* = 15.3 Hz, 1H), 4.05 (s, 3H), 4.02 (s, 3H), 3.55 (d, *J* = 15.3 Hz, 1H), 3.36–3.25 (m, 2H), 3.10 (dd, *J* = 2.9 Hz, 16.4 Hz, 1H), 2.98–2.91 (m, 1H), 2.42–2.37 (m, 1H), 2.34–2.28 (m, 1H), 2.04 (d, *J* = 10.0 Hz, 1H), 1.90 (d, *J* = 12.7 Hz, 1H), 1.88–1.81 (m, 2H), 1.67–1.58 (m, 2H), 1.40 (dd, *J* = 4.1 Hz, 6.8 Hz, 6H); <sup>13</sup>C NMR (125 MHz, CDCl<sub>3</sub>)  $\delta$  149.4, 148.5, 134.3, 129.2, 128.7, 127.2, 126.2, 125.9, 125.7, 123.4, 120.0, 115.2, 103.5 (2C), 57.8, 56.2, 55.9, 55.7, 55.6, 52.4, 34.3, 33.1, 25.5, 24.1, 16.7, 16.5; IR (CHCl<sub>3</sub>)  $\nu_{\text{max}}$  2932, 2864, 2087, 1736, 1609, 1513, 1416, 1304, 1256, 1134, 1036, 967, 785, 688 (cm<sup>-1</sup>); HRMS (FAB): calcd. for C<sub>26</sub>H<sub>33</sub>N<sub>2</sub>O<sub>4</sub>S [M+H]<sup>+</sup> 469.2161, found 469.2157.

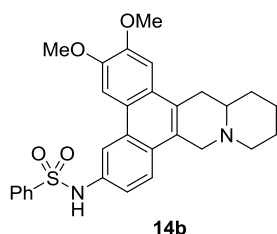

*N*-(2,3-Dimethoxy-11,12,13,14,14a,15-hexahydro-9H-dibenzo[*f,h*]pyrido[1,2-*b*]isoquinolin-6-yl)benzenesulfonamide (**14b**). To a stirred solution of **S6** (81 mg, 0.20 mmol) in 4 mL of EtOH was added SnCl<sub>2</sub> (190 mg, 1.00 mmol) at room temperature, and the reaction mixture was stirred for 6 h at 75 °C. The reaction

mixture was quenched with sat. NaHCO<sub>3</sub> solution, diluted with H<sub>2</sub>O, and extracted with EtOAc. The organic layer was dried over MgSO<sub>4</sub> and concentrated in vacuo to afford crude aniline **S7** as a yellow waxy solid. To a stirred solution of crude aniline **S7** in 10 mL of THF was carefully added LiAlH<sub>4</sub> (400  $\mu$ L, 0.40 mmol, 1 M solution in THF) at 0 °C, and the reaction mixture was refluxed for 1 h. The reaction mixture was quenched by successive addition of H<sub>2</sub>O, a 15% NaOH aq. soln., and H<sub>2</sub>O. The suspension was then filtered over a Celite Pad, and the filtrate was concentrated in vacuo to afford crude quinolizidine **S8** as a brown solid. To a stirred solution of crude quinolizidine **S8** in 3 mL of CH<sub>2</sub>Cl<sub>2</sub> was added pyridine (32  $\mu$ L, 0.40 mmol) and benzenesulfonyl chloride (51  $\mu$ L, 0.40 mmol) at 0 °C, and the reaction mixture was stirred for 1 h at room temperature. The reaction mixture was quenched with sat. NaHCO<sub>3</sub> solution, diluted with H<sub>2</sub>O, and extracted with CH<sub>2</sub>Cl<sub>2</sub>. The organic layer was dried over MgSO<sub>4</sub> and concentrated in vacuo. The crude product was separated by silica gel column chromatography (CH<sub>2</sub>Cl<sub>2</sub>/MeOH, 15:1) to give a sulfonamide **14b** (62 mg, 62%) as a white solid. mp 272.8–273.9 °C; <sup>1</sup>H NMR



(500 MHz, (CD<sub>3</sub>)<sub>2</sub>SO)  $\delta$  8.20 (s, 1H), 7.85 (d,  $J$  = 7.7 Hz, 2H), 7.72 (d,  $J$  = 9.1 Hz, 1H), 7.70 (s, 1H), 7.59–7.52 (m, 3H), 7.33 (d,  $J$  = 8.8 Hz, 1H), 7.23 (s, 1H), 4.25 (d,  $J$  = 15.9 Hz, 1H), 3.97 (s, 3H), 3.91 (s, 3H), 3.36 (d,  $J$  = 15.8 Hz, 1H), 3.11 (d,  $J$  = 10.7 Hz, 1H), 3.04 (d,  $J$  = 15.4 Hz, 1H), 2.67 (dd,  $J$  = 10.7 Hz, 16.2 Hz, 1H), 2.22–2.16 (m, 1H), 2.12 (t,  $J$  = 11.1 Hz, 1H), 1.91 (d,  $J$  = 10.1 Hz, 1H), 1.76 (d,  $J$  = 9.9 Hz, 1H), 1.68 (d,  $J$  = 12.2 Hz, 1H), 1.57 (q,  $J$  = 11.1 Hz, 1H), 1.38–1.29 (m, 2H); <sup>13</sup>C NMR (125 MHz, (CD<sub>3</sub>)<sub>2</sub>SO)  $\delta$  149.4, 148.4, 139.7, 135.2, 132.9, 129.3 (2C), 128.5, 126.7 (2C), 126.0, 125.7, 125.2, 124.9, 123.8, 122.4, 119.0, 112.8, 104.2, 103.2, 57.0, 55.5 (2C), 55.3, 55.2, 33.9, 33.0, 25.4, 23.9; IR (CHCl<sub>3</sub>)  $\nu_{\text{max}}$  2930, 1738, 1611, 1513, 1256, 1154, 1090, 1041, 970, 869, 690 (cm<sup>-1</sup>); HRMS (FAB): calcd. for C<sub>29</sub>H<sub>31</sub>N<sub>2</sub>O<sub>4</sub>S [M+H]<sup>+</sup> 503.2005, found 503.2018.

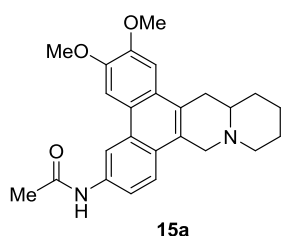

*N*-(2,3-Dimethoxy-11,12,13,14,14a,15-hexahydro-9H-dibenzo[*f,h*]pyrido[1,2-*b*]isoquinolin-6-yl)acetamide (**15a**). To a stirred solution of **S6** (74 mg, 0.18 mmol) in 4 mL of EtOH was added SnCl<sub>2</sub> (171 mg, 1.90 mmol) at room temperature, and the reaction mixture was stirred for 6 h at 75 °C. The reaction mixture was quenched

with sat. NaHCO<sub>3</sub> solution, diluted with H<sub>2</sub>O, and extracted with EtOAc. The organic layer was dried over MgSO<sub>4</sub> and concentrated in vacuo to afford crude aniline **S7** as a yellow waxy solid. To a stirred solution of crude aniline **S7** in 10 mL of THF was carefully added LiAlH<sub>4</sub> (360  $\mu$ L, 0.36 mmol, 1 M solution in THF) at 0 °C, and the reaction mixture was refluxed for 1 h. The reaction mixture was quenched by successive addition of H<sub>2</sub>O, a 15% NaOH aq. soln., and H<sub>2</sub>O. The suspension was then filtered over a Celite Pad, and the filtrate was concentrated in vacuo to afford crude quinolizidine **S8** as a brown solid. To a stirred solution of crude quinolizidine **S8** in 3 mL of CH<sub>2</sub>Cl<sub>2</sub> was added acetyl chloride (26  $\mu$ L, 0.36 mmol) at 0 °C, and the reaction mixture was stirred for 5 h at room temperature. The reaction mixture was quenched with sat. NaHCO<sub>3</sub> solution, diluted with H<sub>2</sub>O, and extracted with CH<sub>2</sub>Cl<sub>2</sub>. The organic layer was dried over MgSO<sub>4</sub> and concentrated in vacuo. The crude product was separated by silica gel column chromatography (CH<sub>2</sub>Cl<sub>2</sub>/MeOH, 15:1) to give an amide **15a** (40 mg, 55%) as a pale yellow solid. mp 208.7–209.9 °C; <sup>1</sup>H NMR (600 MHz, CDCl<sub>3</sub>)  $\delta$  8.81 (s, 1H), 7.89 (s, 1H), 7.72 (d,  $J$  = 8.7 Hz, 1H), 7.56 (brs, 1H), 7.47 (d,  $J$  = 9.2 Hz, 1H), 7.22 (s, 1H), 4.45 (d,  $J$  = 15.5 Hz, 1H), 4.07 (s, 3H), 4.04 (s, 3H), 3.62 (d,  $J$  = 15.5 Hz, 1H), 3.31 (d,  $J$  = 11.0 Hz, 1H), 3.10 (d,  $J$  = 13.3 Hz, 1H), 2.92 (dd,  $J$  = 10.6 Hz, 16.0 Hz, 1H), 2.45 (t,  $J$  = 10.1 Hz, 1H), 2.31 (td,  $J$  = 4.1 Hz, 11.0 Hz, 1H), 2.25 (s, 3H), 2.04 (d,  $J$  = 14.2 Hz, 1H), 1.88 (d,  $J$  = 12.8 Hz, 1H), 1.81–1.75 (m, 2H), 1.61–1.41 (m, 2H); <sup>13</sup>C NMR (75 MHz, CDCl<sub>3</sub>+CD<sub>3</sub>COOD)  $\delta$  170.3, 149.2, 148.9, 136.3, 128.9, 124.4, 124.0, 123.6, 123.4, 122.3, 118.7, 117.4, 111.9, 103.5, 103.4, 66.4, 65.2, 58.1,

55.8 (2C), 35.9, 30.9, 29.3, 27.0, 23.9; IR (CHCl<sub>3</sub>)  $\nu_{\text{max}}$  2983, 2234, 1733, 1301, 1031, 985, 911, 731 (cm<sup>-1</sup>); HRMS (FAB): calcd. for C<sub>25</sub>H<sub>29</sub>N<sub>2</sub>O<sub>3</sub> [M+H]<sup>+</sup> 405.2178, found 405.2183.

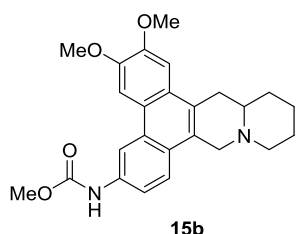

*Methyl* (2,3-Dimethoxy-11,12,13,14,14a,15-hexahydro-9H-dibenzo[f,h]pyrido[1,2-b]isoquinolin-6-yl)carbamate (**15b**). To a stirred solution of

**S6** (74 mg, 0.18 mmol) in 4 mL of EtOH was added SnCl<sub>2</sub> (171 mg, 1.90 mmol) at room temperature, and the reaction mixture was stirred for 6 h at 75 °C. The reaction

mixture was quenched with sat. NaHCO<sub>3</sub> solution, diluted with H<sub>2</sub>O, and extracted with EtOAc. The organic layer was dried over MgSO<sub>4</sub> and concentrated in vacuo to afford crude aniline **S7** as a yellow waxy solid. To a stirred solution of crude aniline **S7** in 10 mL of THF was carefully added LiAlH<sub>4</sub> (360  $\mu$ L, 0.36 mmol, 1 M solution in THF) at 0 °C, and the reaction mixture was refluxed for 1 h. The reaction mixture was quenched by successive addition of H<sub>2</sub>O, a 15% NaOH aq. soln., and H<sub>2</sub>O. The suspension was then filtered over a Celite Pad, and the filtrate was concentrated in vacuo to afford crude quinolizidine **S8** as a brown solid. To a stirred solution of crude quinolizidine **S8** in 3 mL of CH<sub>2</sub>Cl<sub>2</sub> was added pyridine (29  $\mu$ L, 0.36 mmol) and methyl chloroformate (28  $\mu$ L, 0.36 mmol) at 0 °C, and the reaction mixture was stirred for 4 h at room temperature. The reaction mixture was quenched with sat. NaHCO<sub>3</sub> solution, diluted with H<sub>2</sub>O, and extracted with CH<sub>2</sub>Cl<sub>2</sub>. The organic layer was dried over MgSO<sub>4</sub> and concentrated in vacuo. The crude product was separated by silica gel column chromatography (CH<sub>2</sub>Cl<sub>2</sub>/MeOH, 15:1) to give a carbamate **15b** (37 mg, 49%) as a pale yellow solid. mp 215.2–216.5 °C; <sup>1</sup>H NMR (400 MHz, CDCl<sub>3</sub>)  $\delta$  8.52 (brs, 1H), 7.84 (s, 1H), 7.67 (d, *J* = 8.8 Hz, 1H), 7.41 (dd, *J* = 1.7 Hz, 8.8 Hz, 1H), 7.18 (s, 1H), 7.07 (brs, 1H), 4.37 (d, *J* = 15.5 Hz, 1H), 4.05 (s, 3H), 4.02 (s, 3H), 3.81 (s, 3H), 3.55 (d, *J* = 15.6 Hz, 1H), 3.26 (d, *J* = 11.0 Hz, 1H), 3.04 (dd, *J* = 3.2 Hz, 16.4 Hz, 1H), 2.85 (dd, *J* = 10.5 Hz, 16.1 Hz, 1H), 2.38–2.30 (m, 1H), 2.30–2.23 (m, 1H), 2.01 (d, *J* = 13.3 Hz, 1H), 1.87 (d, *J* = 15.2 Hz, 1H), 1.80–1.71 (m, 2H), 1.59–1.37 (m, 2H); <sup>13</sup>C NMR (100 MHz, CDCl<sub>3</sub>)  $\delta$  154.3, 149.4, 148.4, 135.3, 129.4, 126.2, 125.5, 125.2 (2C), 123.6, 123.3, 117.8, 111.2, 103.9, 103.7, 57.5, 56.2, 55.94, 55.89, 55.8, 52.4, 34.6, 33.6, 25.8, 24.3; IR (CHCl<sub>3</sub>)  $\nu_{\text{max}}$  2985, 2936, 1732, 1373, 1238, 1044, 910, 727 (cm<sup>-1</sup>); HRMS (FAB): calcd. for C<sub>25</sub>H<sub>29</sub>N<sub>2</sub>O<sub>4</sub> [M+H]<sup>+</sup> 421.2127, found 421.2133.

### 3. HPLC analysis

HPLC analysis used an Agilent 1200 Series HPLC (Agilent Technologies, Palo Alto, CA, USA). Mobile phase A consisted of 0.1% formic acid in HPLC grade water. The HPLC analysis was performed using a reversed-phase Agilent Eclipse Plus C18 column (4.6 × 150 mm, 3.5 μm) at a flow rate of 0.7 mL/min (30–100% aqueous MeOH with 0.1% formic acid over 20 min and MeOH with 0.1% formic acid from 20 to 25 min).

**Table S1.** Purity of all biologically evaluated compounds.

| Compound                                 | Retention Time, $t_R$ (min) | Purity (%) |
|------------------------------------------|-----------------------------|------------|
| ( <i>R</i> )-antofine ( <b>1</b> )       | 9.363                       | 98.6       |
| ( <i>R</i> )-cryptopleurine ( <b>2</b> ) | 9.606                       | 99.6       |
| <b>5a</b>                                | 6.708                       | 97.7       |
| <b>5b</b>                                | 7.166                       | 98.0       |
| (±)- <b>5b</b>                           | 7.205                       | 97.8       |
| (±)- <b>12b</b>                          | 16.926                      | 99.9       |
| <b>13</b>                                | 7.392                       | 98.8       |
| <b>14a</b>                               | 7.426                       | 96.0       |
| <b>14b</b>                               | 9.300                       | 98.2       |
| <b>15a</b>                               | 9.340                       | 96.1       |
| <b>15b</b>                               | 9.599                       | 97.1       |

(R)-Antofine (1)

=====

Acq. Operator : SYSTEM Seq. Line : 9  
Acq. Instrument : Agilent\_HPLC Location : Vial 45  
Injection Date : 7/25/2013 4:30:17 AM Inj : 1  
Inj Volume : 10.000 µl

Acq. Method : C:\CHEM32\1\DATA\DEF\_LC 2013-07-24 16-01-04\DEFAULT.M  
Last changed : 7/24/2013 4:01:04 PM by SYSTEM  
Analysis Method : C:\CHEM32\1\METHODS\DEF\_LC.M  
Last changed : 3/26/2015 5:10:56 PM  
(modified after loading)

Additional Info : Peak(s) manually integrated

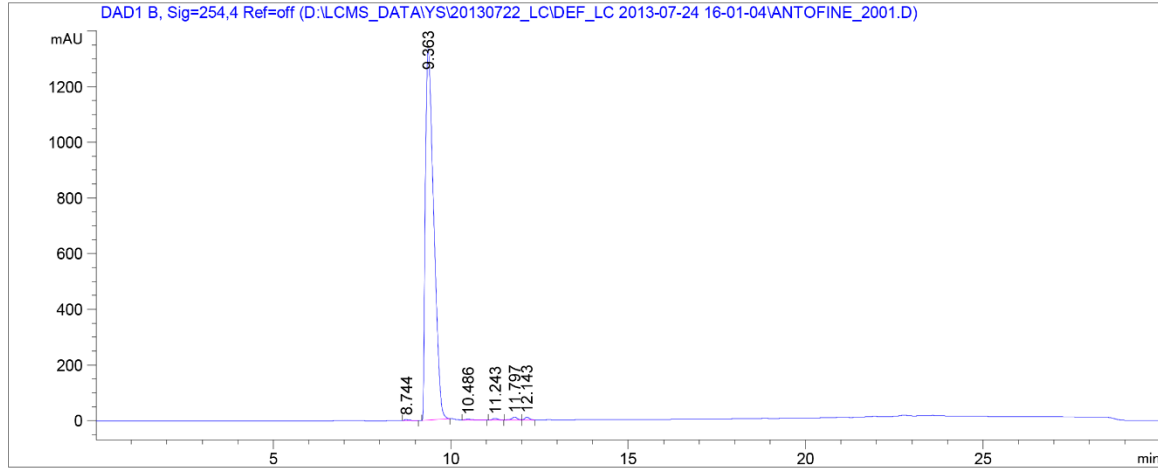

=====  
Area Percent Report  
=====

Sorted By : Signal  
Multiplier : 1.0000  
Dilution : 1.0000  
Use Multiplier & Dilution Factor with ISTDs

Signal 1: DAD1 B, Sig=254,4 Ref=off

| Peak # | RetTime [min] | Type | Width [min] | Area [mAU*s] | Height [mAU] | Area %  |
|--------|---------------|------|-------------|--------------|--------------|---------|
| 1      | 8.744         | BB   | 0.1308      | 35.57224     | 3.96080      | 0.1613  |
| 2      | 9.363         | BB   | 0.2582      | 2.17394e4    | 1333.47498   | 98.5748 |
| 3      | 10.486        | BB   | 0.1548      | 32.25402     | 3.06459      | 0.1463  |
| 4      | 11.243        | BB   | 0.1527      | 58.20122     | 6.02334      | 0.2639  |
| 5      | 11.797        | BB   | 0.1620      | 104.48985    | 9.83407      | 0.4738  |
| 6      | 12.143        | BB   | 0.1434      | 83.78770     | 9.45482      | 0.3799  |

Totals : 2.20537e4 1365.81260

=====  
\*\*\* End of Report \*\*\*

**(R)-Cryptopleurine (2)**

```
=====
Acq. Operator   : SYSTEM                      Seq. Line :    9
Acq. Instrument : Agilent_HPLC                Location  : Vial 66
Injection Date  : 7/26/2013 5:45:06 AM         Inj       :    1
                                           Inj Volume: 10.000 µl

Acq. Method     : C:\CHEM32\1\DATA\DEF_LC 2013-07-25 17-15-24\DEFAULT.M
Last changed    : 7/25/2013 5:15:24 PM by SYSTEM
Analysis Method : C:\CHEM32\1\METHODS\DEF_LC.M
Last changed    : 3/26/2015 5:10:56 PM
                  (modified after loading)
Additional Info  : Peak(s) manually integrated
                  DAD1 B, Sig=254,4 Ref=off (D:\LCMS_DATA\YS20130722_LC\DEF_LC 2013-07-25 17-15-24\CRYPTO_2001.D)
=====
```

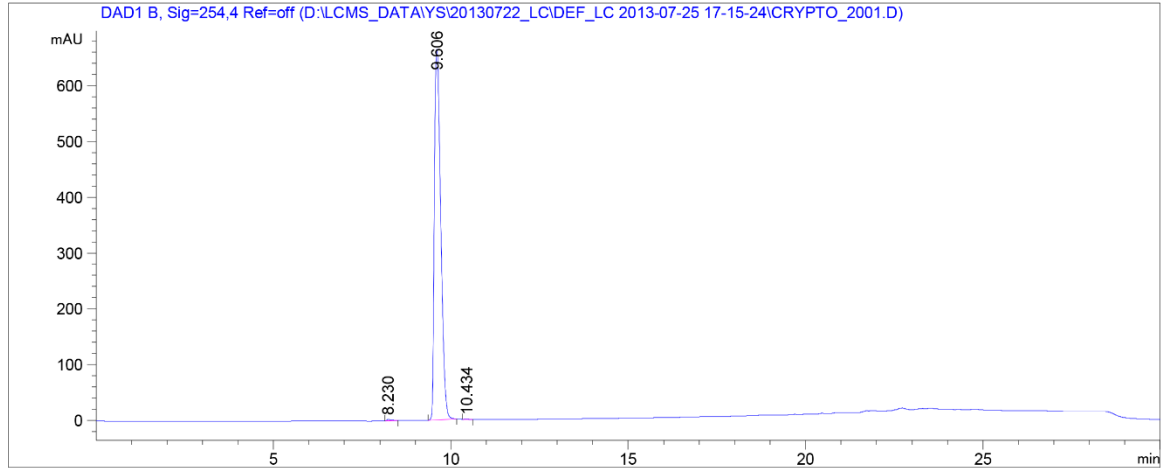

=====  
**Area Percent Report**  
=====

```
Sorted By      :      Signal
Multiplier     :      1.0000
Dilution       :      1.0000
Use Multiplier & Dilution Factor with ISTDs
```

Signal 1: DAD1 B, Sig=254,4 Ref=off

| Peak # | RetTime [min] | Type | Width [min] | Area [mAU*s] | Height [mAU] | Area %  |
|--------|---------------|------|-------------|--------------|--------------|---------|
| 1      | 8.230         | BB   | 0.1140      | 23.16213     | 2.75635      | 0.2767  |
| 2      | 9.606         | BB   | 0.2004      | 8341.59766   | 664.58508    | 99.6360 |
| 3      | 10.434        | BB   | 0.1127      | 7.31297      | 1.03186      | 0.0873  |

Totals :                      8372.07275   668.37330

=====  
\*\*\* End of Report \*\*\*

**(R)-N-(2,3-Dimethoxy-9,11,12,13,13a,14-hexahydrodibenzo[f,h]pyrrolo[1,2-b]isoquinolin-6-yl)methanesulfonamide (5a)**

```

=====
Acq. Operator   : SYSTEM                      Seq. Line :    1
Acq. Instrument : Agilent_HPLC                Location  : Vial 56
Injection Date  : 7/25/2013 6:18:48 PM        Inj       :    3
                                           Inj Volume: 10.000 µl
Acq. Method     : C:\CHEM32\1\DATA\DEF_LC 2013-07-25 17-15-24\DEFAULT.M
Last changed    : 7/25/2013 5:15:24 PM by SYSTEM
Analysis Method : C:\CHEM32\1\METHODS\DEF_LC.M
Last changed    : 3/26/2015 5:10:56 PM
                  (modified after loading)
Additional Info  : Peak(s) manually integrated
  
```

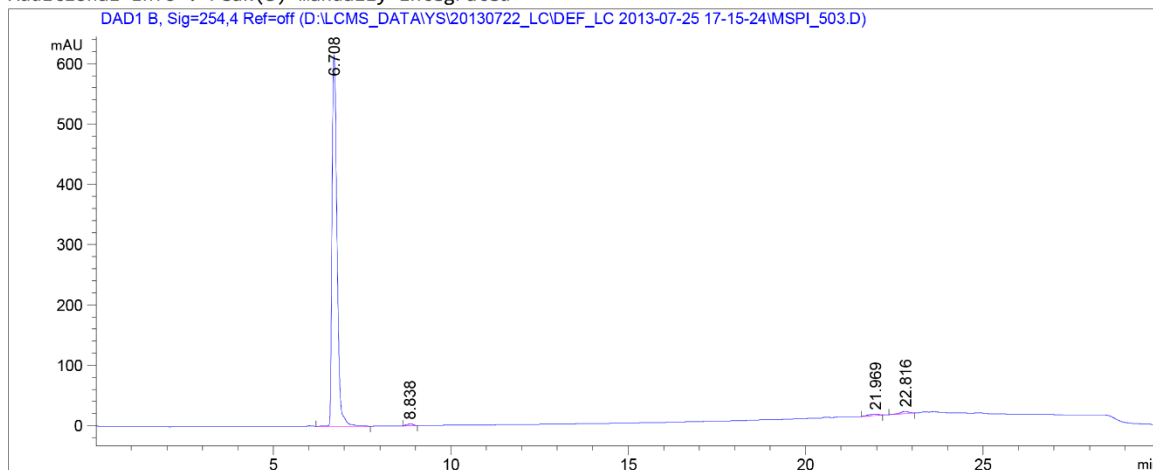

=====  
**Area Percent Report**  
 =====

```

Sorted By      :      Signal
Multiplier     :      1.0000
Dilution       :      1.0000
Use Multiplier & Dilution Factor with ISTDs
  
```

Signal 1: DAD1 B, Sig=254,4 Ref=off

| Peak # | RetTime [min] | Type | Width [min] | Area [mAU*s] | Height [mAU] | Area %  |
|--------|---------------|------|-------------|--------------|--------------|---------|
| 1      | 6.708         | BB   | 0.1554      | 6090.07227   | 615.60669    | 97.7121 |
| 2      | 8.838         | BB   | 0.1605      | 38.06167     | 3.07385      | 0.6107  |
| 3      | 21.969        | BB   | 0.2841      | 44.42401     | 2.10574      | 0.7128  |
| 4      | 22.816        | BB   | 0.2447      | 60.10852     | 3.63843      | 0.9644  |

Totals :                      6232.66646   624.42471

=====  
 \*\*\* End of Report \*\*\*

**(R)-N-(2,3-Dimethoxy-11,12,13,14,14a,15-hexahydro-9H-dibenzo[f,h]pyrido[1,2-b]isoquinolin-6-yl)methanesulfonamide (5b)**

```

=====
Acq. Operator   : SYSTEM                      Seq. Line :    8
Acq. Instrument : Agilent_HPLC                Location  : Vial 78
Injection Date  : 7/27/2013 5:26:43 AM        Inj       :    2
                                           Inj Volume: 10.000 µl

Acq. Method     : C:\CHEM32\1\DATA\DEF_LC 2013-07-26 17-59-27\DEFAULT.M
Last changed    : 7/26/2013 5:59:27 PM by SYSTEM
Analysis Method : C:\CHEM32\1\METHODS\DEF_LC.M
Last changed    : 3/26/2015 5:10:56 PM
                  (modified after loading)
Additional Info  : Peak(s) manually integrated
  
```

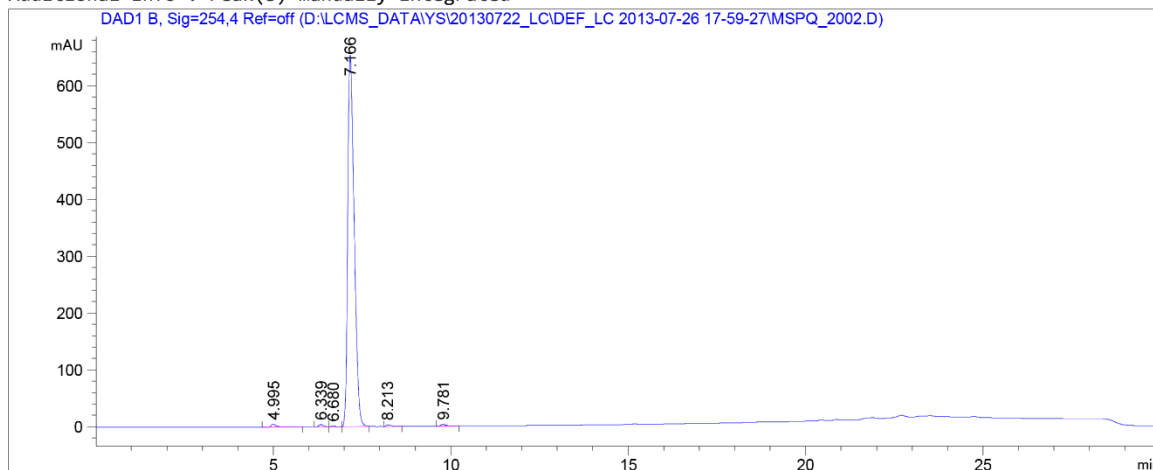

=====  
**Area Percent Report**  
 =====

```

Sorted By      :      Signal
Multiplier     :      1.0000
Dilution       :      1.0000
Use Multiplier & Dilution Factor with ISTDs
  
```

Signal 1: DAD1 B, Sig=254,4 Ref=off

| Peak # | RetTime [min] | Type | Width [min] | Area [mAU*s] | Height [mAU] | Area %  |
|--------|---------------|------|-------------|--------------|--------------|---------|
| 1      | 4.995         | BB   | 0.1561      | 56.41632     | 5.21959      | 0.6767  |
| 2      | 6.339         | BB   | 0.1231      | 33.45209     | 4.10218      | 0.4012  |
| 3      | 6.680         | BB   | 0.1095      | 12.73742     | 1.78007      | 0.1528  |
| 4      | 7.166         | BB   | 0.1877      | 8172.47949   | 654.23041    | 98.0200 |
| 5      | 8.213         | BB   | 0.1222      | 26.78800     | 2.94296      | 0.3213  |
| 6      | 9.781         | BB   | 0.1608      | 35.69016     | 3.33533      | 0.4281  |

Totals :                      8337.56348   671.61054

=====  
 \*\*\* End of Report \*\*\*

***N*-(2,3-Dimethoxy-11,12,13,14,14a,15-hexahydro-9H-dibenzo[*f,h*]pyrido[1,2-*b*]isoquinolin-6-yl)methanesulfonamide ((±)-5b)**

```

=====
Acq. Operator   : SYSTEM                      Seq. Line :    7
Acq. Instrument : Agilent_HPLC                Location  : Vial 77
Injection Date  : 7/27/2013 4:24:19 AM         Inj       :    3
                                           Inj Volume: 10.000 µl
Acq. Method     : C:\CHEM32\1\DATA\DEF_LC 2013-07-26 17-59-27\DEFAULT.M
Last changed    : 7/26/2013 5:59:27 PM by SYSTEM
Analysis Method : C:\CHEM32\1\METHODS\DEF_LC.M
Last changed    : 8/8/2015 3:01:36 PM
                  (modified after loading)
Additional Info  : Peak(s) manually integrated
  
```

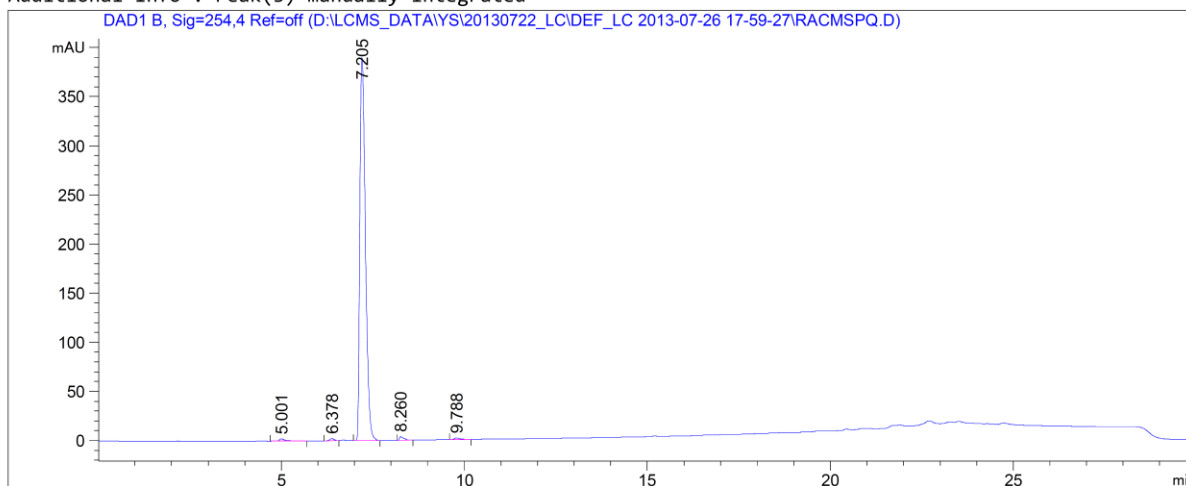

=====  
**Area Percent Report**  
 =====

```

Sorted By      :      Signal
Multiplier     :      1.0000
Dilution       :      1.0000
Use Multiplier & Dilution Factor with ISTDs
  
```

Signal 1: DAD1 B, Sig=254,4 Ref=off

| Peak # | RetTime [min] | Type | Width [min] | Area [mAU*s] | Height [mAU] | Area %  |
|--------|---------------|------|-------------|--------------|--------------|---------|
| 1      | 5.001         | BB   | 0.1621      | 26.86090     | 2.37301      | 0.6370  |
| 2      | 6.378         | BB   | 0.1218      | 17.20870     | 2.13966      | 0.4081  |
| 3      | 7.205         | BB   | 0.1635      | 4123.65967   | 389.67722    | 97.7976 |
| 4      | 8.260         | BB   | 0.1094      | 31.10304     | 3.88670      | 0.7376  |
| 5      | 9.788         | BB   | 0.1615      | 17.69142     | 1.64400      | 0.4196  |

Totals :                      4216.52374   399.72059

=====  
 \*\*\* End of Report \*\*\*



***N*-(2,3-Dimethoxy-9-oxo-11,12,13,14,14a,15-hexahydro-9*H*-dibenzo[*f,h*]pyrido[1,2-*b*]isoquinolin-6-yl)methanesulfonamide ((±)-12b)**

```

=====
Acq. Operator   : SYSTEM                      Seq. Line :    2
Acq. Instrument : Agilent_HPLC                Location  : Vial 31
Injection Date  : 8/6/2015 5:25:31 PM          Inj       :    1
                                           Inj Volume: 10.000 µl
Different Inj Volume from Sequence ! Actual Inj Volume : 5.000 µl
Acq. Method     : D:\LC DATA\DEFAULT 2015-08-06 16-53-23\DEFAULT.M
Last changed    : 8/6/2015 4:53:23 PM by SYSTEM
Analysis Method  : C:\CHEM32\1\METHODS\DEF_LC.M
Last changed    : 8/13/2015 11:14:12 AM
                  (modified after loading)
  
```

Additional Info : Peak(s) manually integrated

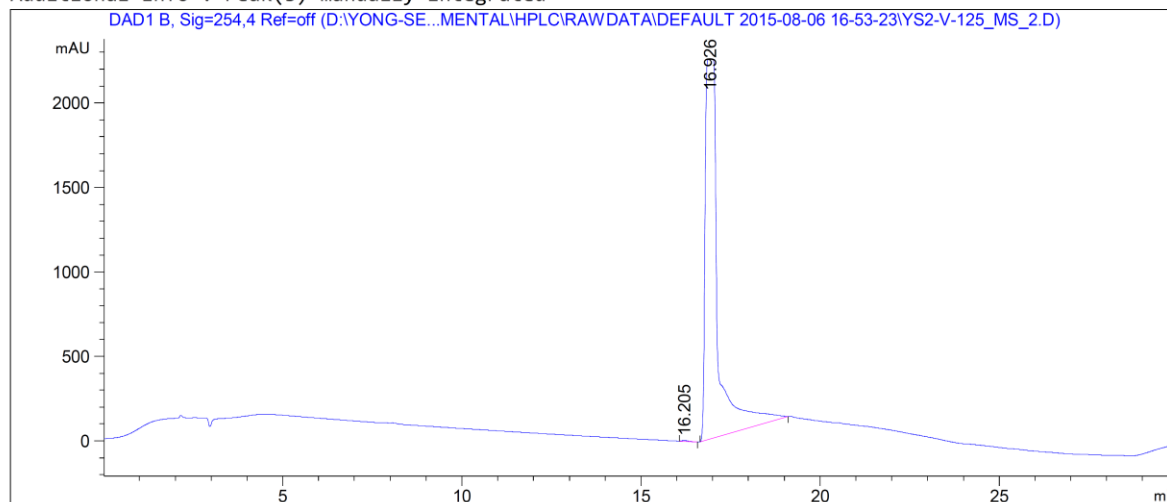

=====  
Area Percent Report  
=====

```

Sorted By      :      Signal
Multiplier     :      1.0000
Dilution       :      1.0000
Use Multiplier & Dilution Factor with ISTDs
  
```

Signal 1: DAD1 B, Sig=254,4 Ref=off

| Peak # | RetTime [min] | Type | Width [min] | Area [mAU*s] | Height [mAU] | Area %  |
|--------|---------------|------|-------------|--------------|--------------|---------|
| 1      | 16.205        | BB   | 0.1519      | 74.54596     | 7.50295      | 0.1323  |
| 2      | 16.926        | BB   | 0.2977      | 5.62724e4    | 2250.84229   | 99.8677 |

Totals :                      5.63469e4   2258.34523

=====  
\*\*\* End of Report \*\*\*

***N*-(4-(8-(3,4-Dimethoxyphenyl)-6-oxo-1,3,4,6,9,9a-hexahydro-2*H*-quinolizin-7-yl)phenyl)methanesulfonamide (13)**

```
=====
Acq. Operator   : SYSTEM                      Seq. Line :    6
Acq. Instrument : Agilent_HPLC                Location  : Vial 32
Injection Date  : 8/8/2015 12:46:51 PM         Inj       :    1
                                           Inj Volume: 10.000 µl

Acq. Method     : D:\LC DATA\DEFAULT 2015-08-08 10-10-06\DEFAULT.M
Last changed    : 8/8/2015 10:10:06 AM by SYSTEM
Analysis Method : C:\CHEM32\1\METHODS\DEF_LC.M
Last changed    : 8/13/2015 10:44:50 AM
                  (modified after loading)
Additional Info : Peak(s) manually integrated
```

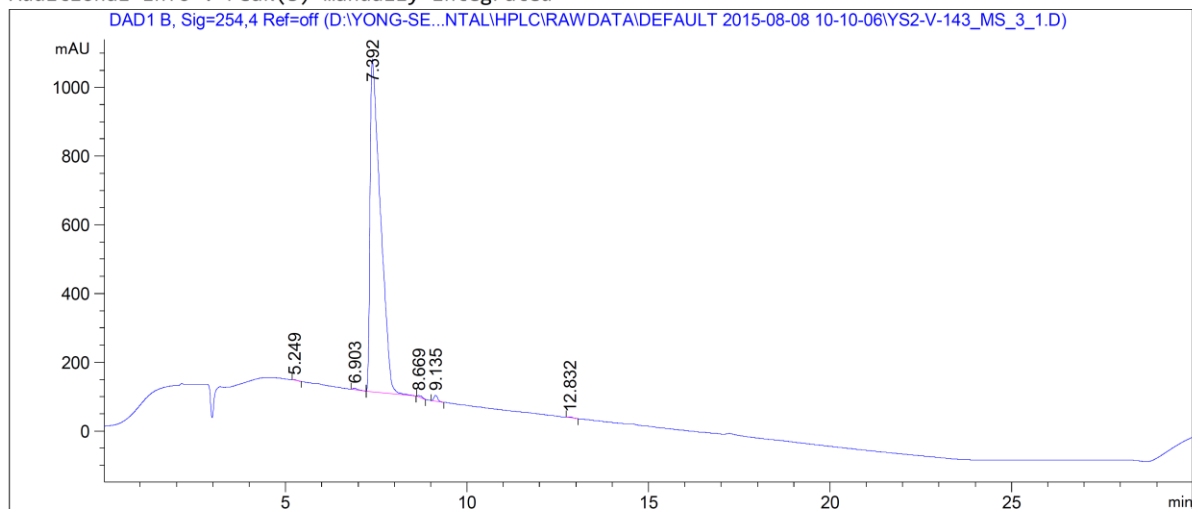

Area Percent Report

```
Sorted By      :      Signal
Multiplier     :      1.0000
Dilution       :      1.0000
Use Multiplier & Dilution Factor with ISTDs
```

Signal 1: DAD1 B, Sig=254,4 Ref=off

| Peak # | RetTime [min] | Type | Width [min] | Area [mAU*s] | Height [mAU] | Area %  |
|--------|---------------|------|-------------|--------------|--------------|---------|
| 1      | 5.249         | BB   | 0.1108      | 11.41037     | 1.60812      | 0.0589  |
| 2      | 6.903         | BB   | 0.1324      | 36.80860     | 4.11376      | 0.1900  |
| 3      | 7.392         | BB   | 0.2809      | 1.91495e4    | 967.74664    | 98.8344 |
| 4      | 8.669         | BB   | 0.1266      | 37.98580     | 3.93621      | 0.1961  |
| 5      | 9.135         | BB   | 0.1060      | 118.81143    | 17.31701     | 0.6132  |
| 6      | 12.832        | BB   | 0.1373      | 20.81833     | 2.35164      | 0.1074  |

Totals :                      1.93754e4    997.07338

\*\*\* End of Report \*\*\*

***N*-(2,3-Dimethoxy-11,12,13,14,14a,15-hexahydro-9*H*-dibenzo[*f,h*]pyrido[1,2-*b*]isoquinolin-6-yl)propane-2-sulfonamide (14a)**

```
=====
Acq. Operator   : SYSTEM                      Seq. Line :    1
Acq. Instrument : Agilent_HPLC                Location  : Vial 62
Injection Date  : 8/12/2015 3:42:57 PM        Inj       :    1
                                           Inj Volume: 10.000 µl
Different Inj Volume from Sequence !    Actual Inj Volume : 5.000 µl
Acq. Method     : C:\CHEM32\1\DATA\DEF_LC 2015-08-12 15-41-50\DEFAULT.M
Last changed    : 8/12/2015 3:41:52 PM by SYSTEM
Analysis Method : C:\CHEM32\1\METHODS\DEF_LC.M
Last changed    : 8/13/2015 11:14:12 AM
                  (modified after loading)
```

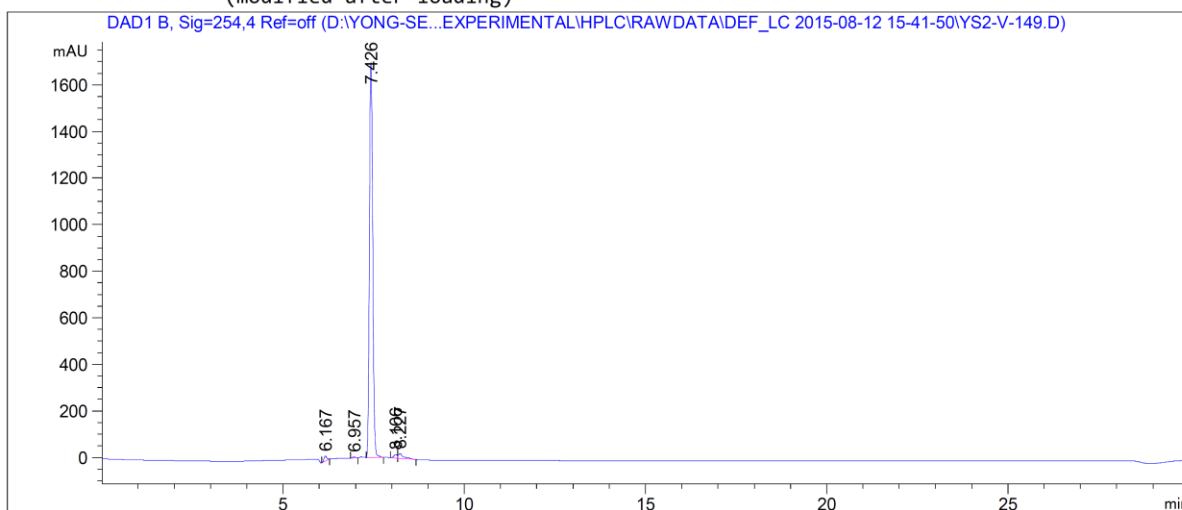

Area Percent Report

```
Sorted By      : Signal
Multiplier     : 1.0000
Dilution       : 1.0000
Use Multiplier & Dilution Factor with ISTDs
```

Signal 1: DAD1 B, Sig=254,4 Ref=off

| Peak # | RetTime [min] | Type | Width [min] | Area [mAU*s] | Height [mAU] | Area %  |
|--------|---------------|------|-------------|--------------|--------------|---------|
| 1      | 6.167         | BB   | 0.0808      | 115.17827    | 21.40039     | 1.0240  |
| 2      | 6.957         | BB   | 0.0868      | 27.48657     | 5.10595      | 0.2444  |
| 3      | 7.426         | BB   | 0.1000      | 1.07931e4    | 1701.98499   | 95.9555 |
| 4      | 8.106         | BV   | 0.0927      | 98.29811     | 15.77552     | 0.8739  |
| 5      | 8.227         | VB   | 0.1381      | 213.96376    | 21.50491     | 1.9022  |

Totals : 1.12480e4 1765.77176

\*\*\* End of Report \*\*\*

***N*-(2,3-dimethoxy-11,12,13,14,14a,15-hexahydro-9*H*-dibenzo[*f,h*]pyrido[1,2-*b*]isoquinolin-6-yl)benzenesulfonamide (14b)**

```
=====
Acq. Operator   : SYSTEM                      Seq. Line :    1
Acq. Instrument : Agilent_HPLC                Location  : Vial 41
Injection Date  : 8/6/2015 2:37:07 PM          Inj       :    1
                                           Inj Volume: 10.000 µl

Acq. Method     : D:\LC DATA\DEFAULT 2015-08-06 14-36-09\DEFAULT.M
Last changed    : 8/6/2015 2:36:09 PM by SYSTEM
Analysis Method : C:\CHEM32\1\METHODS\DEF_LC.M
Last changed    : 8/13/2015 11:14:12 AM
                  (modified after loading)
Additional Info : Peak(s) manually integrated
```

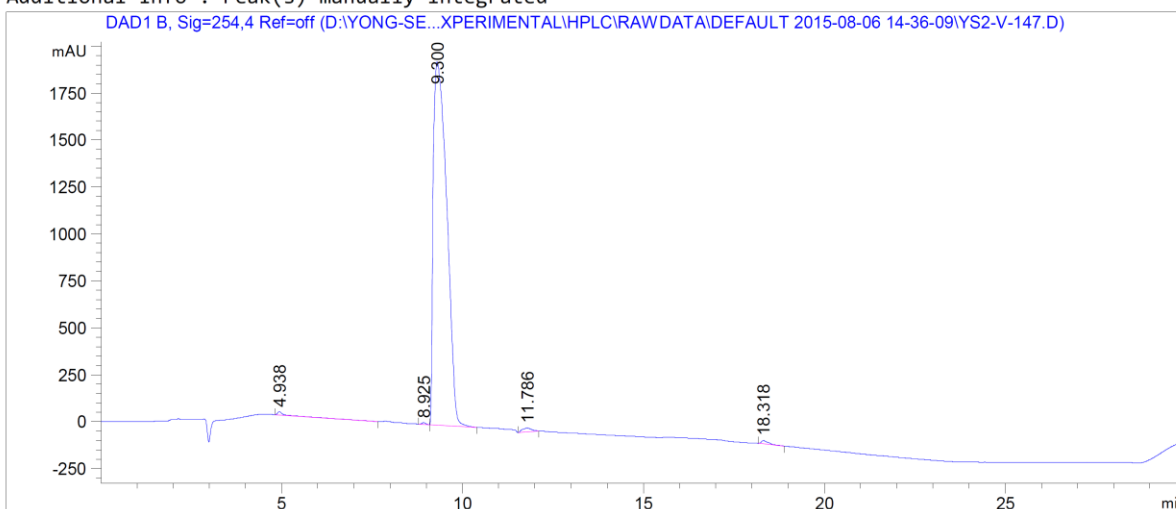

=====  
Area Percent Report  
=====

```
Sorted By      :      Signal
Multiplier     :      1.0000
Dilution       :      1.0000
Use Multiplier & Dilution Factor with ISTDs
```

Signal 1: DAD1 B, Sig=254,4 Ref=off

| Peak # | RetTime [min] | Type | Width [min] | Area [mAU*s] | Height [mAU] | Area %  |
|--------|---------------|------|-------------|--------------|--------------|---------|
| 1      | 4.938         | BB   | 0.1857      | 238.50041    | 17.64525     | 0.4696  |
| 2      | 8.925         | BV   | 0.1118      | 65.58762     | 8.92004      | 0.1291  |
| 3      | 9.300         | VB   | 0.4467      | 4.98822e4    | 1935.03870   | 98.2141 |
| 4      | 11.786        | BB   | 0.2580      | 370.95477    | 20.60879     | 0.7304  |
| 5      | 18.318        | BB   | 0.1839      | 232.00378    | 17.59076     | 0.4568  |

Totals :                      5.07893e4 1999.80353

=====  
\*\*\* End of Report \*\*\*

***N*-(2,3-Dimethoxy-11,12,13,14,14a,15-hexahydro-9*H*-dibenzo[*f,h*]pyrido[1,2-*b*]isoquinolin-6-yl)acetamide  
(15a)**

```
=====
Acq. Operator   : SYSTEM                      Seq. Line :    2
Acq. Instrument : Agilent_HPLC                Location  : Vial 72
Injection Date  : 8/12/2015 7:50:07 PM        Inj       :    1
                                           Inj Volume: 10.000 µl
Different Inj Volume from Sequence ! Actual Inj Volume : 5.000 µl
Acq. Method     : C:\CHEM32\1\DATA\DEF_LC 2015-08-12 19-17-50\DEFAULT.M
Last changed    : 8/12/2015 7:17:52 PM by SYSTEM
Analysis Method : C:\CHEM32\1\METHODS\DEF_LC.M
Last changed    : 8/13/2015 11:14:12 AM
                  (modified after loading)
Additional Info : Peak(s) manually integrated
```

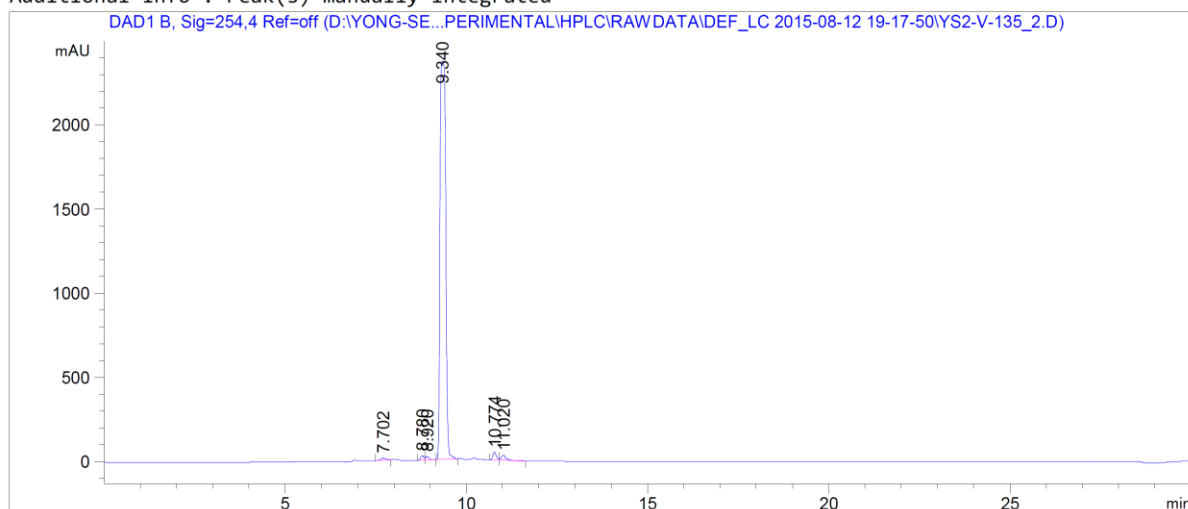

=====  
Area Percent Report  
=====

```
Sorted By      :      Signal
Multiplier     :      1.0000
Dilution       :      1.0000
Use Multiplier & Dilution Factor with ISTDs
```

Signal 1: DAD1 B, Sig=254,4 Ref=off

| Peak # | RetTime [min] | Type | Width [min] | Area [mAU*s] | Height [mAU] | Area %  |
|--------|---------------|------|-------------|--------------|--------------|---------|
| 1      | 7.702         | BB   | 0.1255      | 138.23685    | 15.28483     | 0.5233  |
| 2      | 8.780         | BV   | 0.0918      | 160.14354    | 26.75917     | 0.6062  |
| 3      | 8.920         | VB   | 0.1101      | 149.70096    | 20.27711     | 0.5667  |
| 4      | 9.340         | BB   | 0.1753      | 2.53767e4    | 2363.65649   | 96.0569 |
| 5      | 10.774        | BV   | 0.1011      | 312.07095    | 47.23480     | 1.1813  |
| 6      | 11.020        | VB   | 0.1418      | 281.54953    | 29.38539     | 1.0657  |

Totals :                    2.64184e4  2502.59779

**Methyl (2,3-Dimethoxy-11,12,13,14,14a,15-hexahydro-9H-dibenzo[f,h]pyrido[1,2-b]isoquinolin-6-yl)carbamate (15b)**

```

=====
Acq. Operator   : SYSTEM                      Seq. Line :    1
Acq. Instrument : Agilent_HPLC                Location  : Vial 52
Injection Date  : 8/12/2015 6:07:44 PM        Inj       :    1
                                           Inj Volume: 10.000 µl
Different Inj Volume from Sequence ! Actual Inj Volume : 3.000 µl
Acq. Method     : C:\CHEM32\1\DATA\DEF_LC 2015-08-12 18-06-40\DEFAULT.M
Last changed    : 8/12/2015 6:06:42 PM by SYSTEM
Analysis Method : C:\CHEM32\1\METHODS\DEF_LC.M
Last changed    : 8/13/2015 11:14:12 AM
                  (modified after loading)
  
```

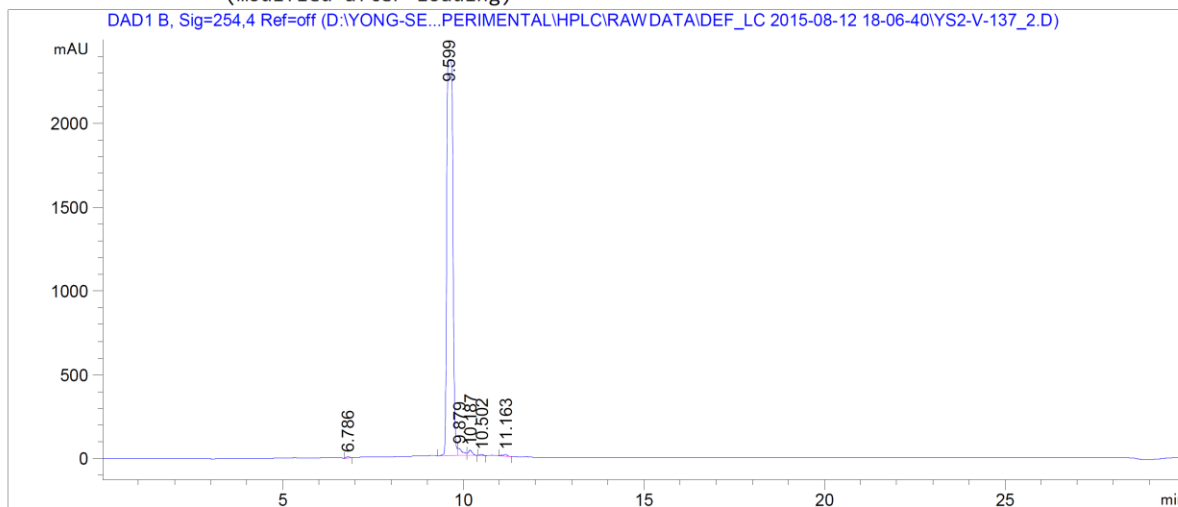

=====  
Area Percent Report  
=====

```

Sorted By      :      Signal
Multiplier     :      1.0000
Dilution       :      1.0000
Use Multiplier & Dilution Factor with ISTDs
  
```

Signal 1: DAD1 B, Sig=254,4 Ref=off

| Peak # | RetTime [min] | Type | Width [min] | Area [mAU*s] | Height [mAU] | Area %  |
|--------|---------------|------|-------------|--------------|--------------|---------|
| 1      | 6.786         | BB   | 0.0973      | 44.09681     | 7.01427      | 0.1565  |
| 2      | 9.599         | BV   | 0.1591      | 2.73616e4    | 2362.70752   | 97.0841 |
| 3      | 9.879         | VV   | 0.1277      | 397.97348    | 43.12104     | 1.4121  |
| 4      | 10.187        | VB   | 0.1184      | 243.24095    | 30.71501     | 0.8631  |
| 5      | 10.502        | BB   | 0.0973      | 46.50497     | 7.40675      | 0.1650  |
| 6      | 11.163        | BB   | 0.1089      | 89.99634     | 12.08225     | 0.3193  |

Totals :                      2.81834e4   2463.04684

=====  
\*\*\* End of Report \*\*\*

#### 4. Antitumor activity of (*R*)-cryptopleurine (**2**)

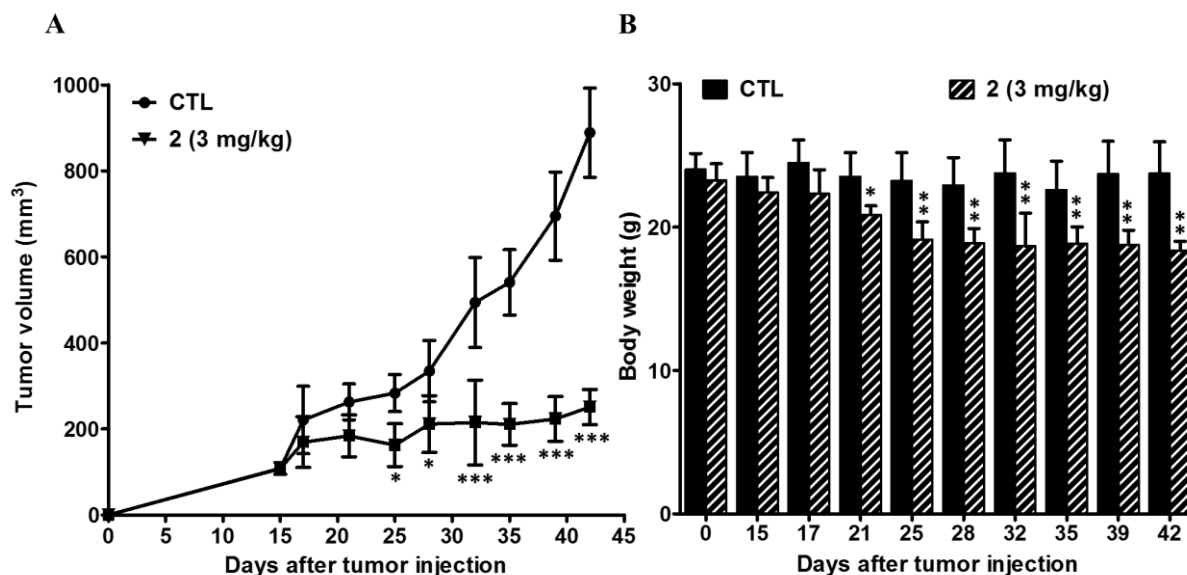

**Figure S1.** Antitumor activity of **2**. **A)** The antitumor activity of **2**. Caki-1 cells ( $1 \times 10^7$  cells/mouse) were subcutaneously injected into the flanks of nude mice. Treatment with the test compounds was initiated when tumor volumes reached  $\sim 100$  mm<sup>3</sup>. **2** (3 mg/kg body weight) was orally administered five times per week in a volume of 200  $\mu$ L. The control group was treated with an equal volume of vehicle. Tumor volumes were measured with a caliper every 2-3 days. **B)** The body weight change in the tumor xenograft model. Body weights were monitored every 2-3 days. \* $p < 0.05$ , \*\* $p < 0.01$ , \*\*\* $p < 0.001$  by *t*-test.
